# Supplementary material for: Extracellular Vesicle MicroRNAs From Corneal Stromal Stem Cell Enhance Stemness of Limbal Epithelial Stem Cells by Targeting the Notch Pathway
Source: PubMed Central journal article supplement — Invest Ophthalmol Vis Sci. 2023 Sep 28;64(12):42. doi: 10.1167/iovs.64.12.42 (PMC10541724; doi:10.1167/iovs.64.12.42), 2023-09-28
Supplement: iovs-64-12-42_s002.pdf [file iovs-64-12-42_s002.pdf]

**Table S1.** Primers used in this study.

| Primer name   | Forward               | Reverse                 |
|---------------|-----------------------|-------------------------|
| <i>p63a</i>   | CCACCTGGACGTATTCCACTG | TCGAATCAAATGACTAGGAGGGG |
| <i>K12</i>    | CTCTCCTCGCAGAGTGTGATA | AACTAGAACCAAACATGGAAGCA |
| <i>K14</i>    | TGAGCCGCATTCTGAACGAG  | GATGACTGCGATCCAGAGGA    |
| <i>Alix</i>   | ATGGCGACATTCATCTCGGTG | CGCTTGGGTAAGTCTGCTGG    |
| <i>Notch1</i> | ATCCAGAGGCAAACGGAG    | CACATGGCAACATCTAACCC    |
| <i>Hes1</i>   | GAGAGGCGGCTAAGGTGTTT  | GTGTAGACGGGGATGACAGG    |
| <i>GAPDH</i>  | GGAGCGAGATCCCTCCAAAAT | GGCTGTTGTCATACTTCTCATGG |
